# Supplementary material
Source: PubMed Central journal article supplement (PMC4091151)
Supplement: auto-10-642-s01.pdf [file auto-10-642-s01.pdf]

## Supplemental information

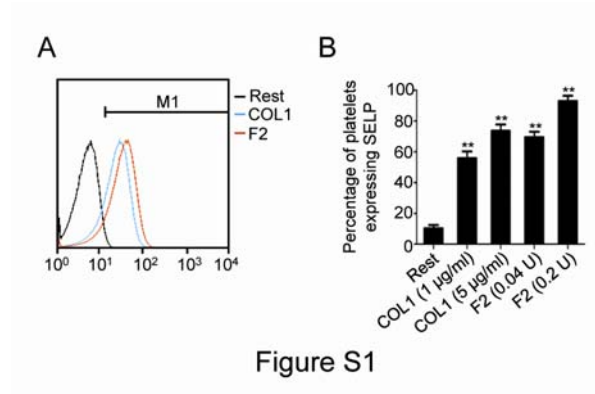

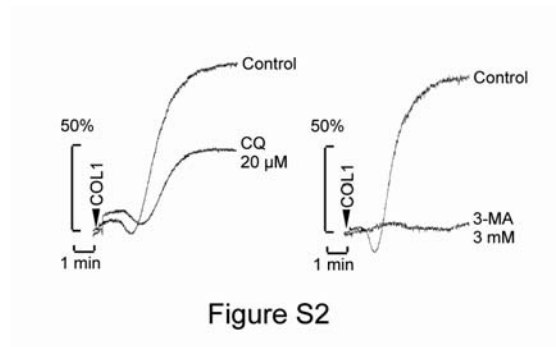

Figure S2

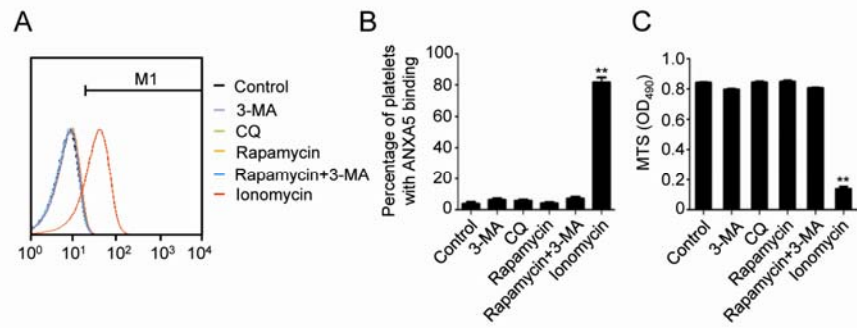

Figure S3

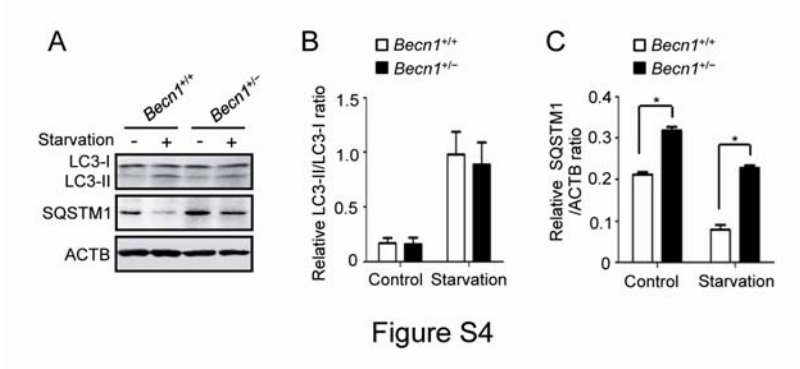

## Figure legends

**Figure S1.** Expression of SELP [selectin P (granule membrane protein 140kDa, antigen CD62)] on platelet surface. (A) Human platelets treated with COL1 (1  $\mu\text{g}/\text{ml}$ ) or F2/thrombin (0.04 U) for 10 min were incubated with FITC-conjugated anti-CD62P and analyzed by flow cytometry. Representative histogram was shown. (B) Quantification of SELP expression on the surface of platelet. Results are shown as mean  $\pm$  SEM percentage of platelets with positive SELP staining from 3 independent experiments.  $**P < 0.01$ .

**Figure S2.** Blocking autophagic degradation inhibits platelet aggregation in PRP. Normal human PRP ( $300 \times 10^6$  platelets/ml) was pretreated with 3-MA or CQ at the indicated concentrations for 1.5 h. Then COL1 (1  $\mu\text{g}/\text{ml}$ ) was added and the aggregation was recorded using an aggregometer.

**Figure S3.** Effect of autophagy disruption on platelet viability. (A) Human platelets were treated with 3 mM 3-MA, 20  $\mu\text{M}$  CQ or 3  $\mu\text{M}$  ionomycin for 1.5 h, 200 nM rapamycin with or without 3-MA for 2 h. Then the platelets were incubated with FITC-conjugated ANXA5 and analyzed by flow cytometry. Representative histogram was shown. (B) Quantification of ANXA5-positive platelets. Results are shown as mean  $\pm$  SEM from 3 independent experiments.  $**P < 0.01$ . (C) Platelets were treated as in (A) and tested by MTS assay. Results are shown as mean  $\pm$  SEM from 3 independent experiments.  $**P < 0.01$ .

**Figure S4.** Impaired autophagy in *Becn1*-deficient platelets. (A) Fresh platelets isolated from *Becn1*<sup>+/+</sup> or *Becn1*<sup>+/-</sup> mice were starved and subjected to western blot

analysis with anti-SQSTM1 and anti-LC3 antibodies. **(B and C)** Statistical analysis of LC3-II/LC3-I ratio **(B)** and SQSTM1/ACTB ratio **(C)**. Results are shown as mean  $\pm$  SEM from 3 independent experiments. \* $P < 0.05$ .
